# Supplementary material for: Lateral inhibition of Notch signaling in neoplastic cells
Source: PubMed Central journal article supplement (PMC4359323; doi:10.18632/oncotarget.2762), 2014-12-09
Supplement: oncotarget-06-1666-s001.pdf [file oncotarget-06-1666-s001.pdf]

**SUPPLEMENTARY FIGURE**

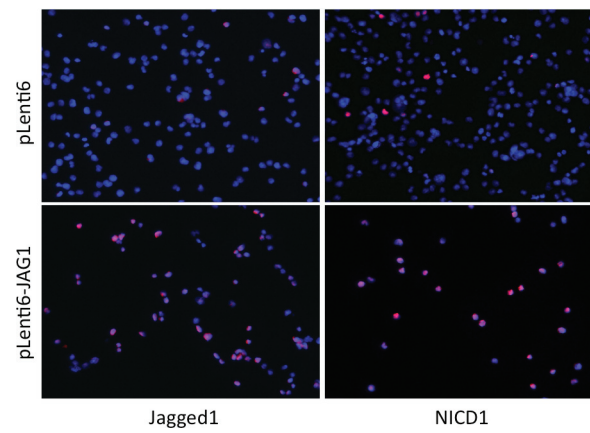

**Supplemental Figure 1: JAG1 and NICD immunofluorescent expression in GBM1 pLenti6 and pLenti6-JAG1 expressing cells.** Prepared as described in the Materials and Methods, these images are representative of 3 separate stainings. Individual antigen positive (red) and total cells (blue) were counted using the count tool in ImageJ software.
